# Supplementary material for: Theta oscillations in 4-year-olds are sensitive to task engagement and task demands
Source: PubMed Central journal article supplement (PMC6465288; doi:10.1038/s41598-019-42615-x), 2019-04-15
Supplement: 41598_2019_42615_MOESM1_ESM.pdf [file 41598_2019_42615_MOESM1_ESM.pdf]

# Donders Institute

for Brain, Cognition and Behaviour

Centre for Cognition  
Montessorilaan 3  
6500 HE Nijmegen  
The Netherlands

November, 2018

To whom it may concern,

Permission is granted to (Springer Nature Limited), to publish the image (Figure 1) under a CC BY open access license. Permission is granted to publish the image in all formats i.e. print and digital.



Yours sincerely,

Marlene Meyer & Hinke M. Endedijk (the woman on the picture)
